1     **Title:**                             **Mechanistic insights into heterogeneous**  
2                                             **radiofrequency ablation effects at the left atrial**  
3                                             **posterior wall during pulmonary vein isolation**  
4  
5     **Author:**                             David R. Tomlinson BM BSc MD  
6     **Corresponding address:**         University Hospitals Plymouth NHS Trust, South West  
7                                             Cardiothoracic Centre, Derriford Hospital, Plymouth, UK, PL6  
8                                             8DH  
9     **Tel:**                                 01752 431838  
10    **Email:**                             [david.tomlinson1@nhs.net](mailto:david.tomlinson1@nhs.net)  
11    **Word count:**                     Abstract 250; body text 3663

12  
13  
14  
15  
16  
17  
18  
19

## 20 **Abstract**

### 21 **Background**

22 Independent investigations demonstrate greater radiofrequency (RF) ablation effects at left-  
23 sided left atrial posterior wall (LAPW) sites.

### 24 **Objective**

25 To investigate mechanisms underlying RF ablation heterogeneity during contact-force (CF)  
26 and VISITAG™ Module (Biosense Webster)-guided pulmonary vein isolation (PVI).

### 27 **Methods**

28 Consecutive patients undergoing PVI during atrial overdrive pacing comprised 2 cohorts:  
29 intermittent positive pressure ventilation (IPPV, 14-16/min, 6-8ml/kg); high frequency jet  
30 ventilation (HFJV, 150/min, Monsoon III, Acutronic). Temperature-controlled (17ml/min,  
31 48°C) RF data was retrospectively assessed at first-annotated (target 15s) LAPW sites: 30W  
32 during IPPV; 20W at left-sided sites during HFJV.

### 33 **Results**

34 Twenty-five and 15 patients underwent PVI during IPPV and HFJV, respectively. During  
35 IPPV, left versus right-sided median impedance drop (ImpD) was 13.6Ω versus 9.9Ω  
36 ( $p<0.0001$ ) respectively and mean time to pure R unipolar electrogram (UE) morphology  
37 change 4.9s versus 6.7s ( $p=0.007$ ) respectively. During HFJV, ImpD was greater at left-sided  
38 sites (9.7Ω versus 7.4Ω,  $p=0.21$ ) and time to pure R UE significantly shorter: 4.3s versus 6.1s  
39 ( $p=0.02$ ). Minimum case impedance subtracted from pre-RF baseline impedance (BI)  
40 generated site-specific  $\Delta$ BI. Left-sided sites demonstrated significantly greater  $\Delta$ BI,  
41 correlating strongly with  $\ln(\text{ImpD})$  – IPPV  $r=0.84$  (0.65 – 0.93), HFJV  $r=0.77$  (0.35 – 0.93).

42 At right-sided sites,  $\Delta BI$  and  $\text{Ln}(\text{ImpD})$  were without correlation during IPPV, but correlation  
43 was modest during HFJV ( $r=0.54, -0.007 - 0.84$ ).

#### 44 **Conclusions**

45  $\Delta BI$  may usefully indicate catheter-tissue contact surface area (SA). Consequently, greater  
46 left-sided LAPW RF effect may result from greater contact SA and in-phase catheter-tissue  
47 motion; HFJV may reduce right-sided out-of-phase catheter-tissue motion. Modifying RF  
48 delivery based on  $\Delta BI$  may improve PVI safety and efficacy.

49

50

51

52

53

54

55

56

57

58

59

60

61

## 62 **Introduction**

63 Pulmonary vein electrical isolation (PVI) is considered a prerequisite for atrial fibrillation  
64 (AF) ablation success.<sup>1</sup> However, delivering permanently overlapping and transmural (TM)  
65 lesions without complications is a complex undertaking; on the one hand, non-TM lesions  
66 result in late pulmonary vein (PV) electrical gaps and recurrent AF<sup>2</sup>, whereas excessive focal  
67 radiofrequency (RF) energy delivery risks life-threatening extra-cardiac thermal trauma.<sup>3</sup>

68 Recently, RF annotation modules have been developed in an effort to provide guidance  
69 towards appropriate “per-site” RF delivery during RF PVI. These include novel systems for  
70 assessing the adequacy of “per-site” RF lesions, using weighted formulae incorporating  
71 catheter-tissue contact-force (CF), RF power and duration.<sup>4</sup> Sites of RF application are  
72 automatically displayed on a 3-D electroanatomical map using objective descriptors of  
73 catheter stability, theoretically facilitating the development of safe, effective and reproducible  
74 PVI protocols.<sup>5</sup> Subsequent studies have demonstrated how, following the derivation of  
75 putative ideal “per-site” targets for RF delivery via retrospective analyses of VISITAG™  
76 Module annotation (Biosense Webster Inc., Diamond Bar, CA), >90% freedom from  
77 implantable loop recorder (ILR)-detected AF may result from active CF and VISITAG™  
78 Module guidance during PVI.<sup>6</sup> However, in this “CLOSE-guided” PVI 85 patient cohort,  
79 75% experienced intra-oesophageal temperature rise >38.5°C (ITR, SensiTherm™, Abbott),  
80 totalling 183 episodes.<sup>7</sup> Furthermore, the significantly greater proportion of ITR events  
81 occurring at the left-side of the LAPW indicates possible heterogeneity of RF effect at the LA  
82 posterior wall (LAPW). Such heterogeneity of RF effect during PVI has been demonstrated  
83 previously, with independently conducted investigations providing evidence towards  
84 significantly greater RF effect at left-sided left atrial sites.<sup>8,9</sup> More recently and via  
85 retrospective analyses of VISITAG™ Module annotated sites, ~30% greater RF effect was  
86 demonstrated at the left side of the LAPW, evidenced by significantly greater absolute

87 impedance decrease and shorter time to pure R unipolar electrogram (UE) morphology  
88 change<sup>10</sup> – a histologically validated marker of transmural (TM) RF effect in atrial tissue, *in*  
89 *vivo*.<sup>11,12</sup> Importantly, off-line analyses of exported catheter RF and position data indicated  
90 that these findings were neither due to differences in RF duration, nor simply greater catheter  
91 instability and/or lower CF at right-sided LAPW sites.<sup>10</sup>

92 Taken together, these data indicate significantly greater RF effect at the left side of the  
93 LAPW of clinical relevance, yet without mechanistic explanation. One possibility is the  
94 occurrence of cardiac and/or respiratory cycle-induced site-specific differences in the  
95 magnitude of out-of-phase (i.e. sliding) catheter-tissue interaction. While it is neither  
96 desirable nor technically possible to perform PVI during complete atrial and ventricular  
97 standstill, high frequency jet ventilation (HFJV) provides means to eliminate respiratory  
98 cycle-induced changes in catheter-tissue interaction. Therefore, the aim of this present report  
99 was to retrospectively assess the magnitude of RF effects at first-ablated left and right-sided  
100 LAPW sites in consecutive cohorts of patients undergoing PVI during either intermittent  
101 positive pressure ventilation (IPPV), or HFJV.

102

## 103 **Methods**

104 Single-operator (DRT) CF and VISITAG™ Module-guided PVI was performed employing a  
105 previously reported protocol<sup>10</sup> in consecutive, unselected adult patients with symptomatic AF  
106 undergoing first-time PVI according to current treatment indications.<sup>1</sup> All procedures were  
107 undertaken using general anaesthesia (GA) with endotracheal intubation. Single transseptal  
108 access was obtained with an SL1 (Abbott Cardiovascular, St Paul, MN) sheath, following  
109 which either a NaviStar® THERMOCOOL® SMARTTOUCH™ (ST) F curve or NaviStar®  
110 EZSTEER® THERMOCOOL® SMARTTOUCH™ D/F catheter (Biosense Webster) via an

111 Agilis™ NxT sheath (Abbott) was placed in the LA via the first transseptal site.  
112 ACCURESP™ respiratory training was undertaken pre-ablation and applied as required to  
113 the CARTO® geometry, created using a LASSO® Nav catheter (Biosense Webster). Where  
114 respiratory motion was insufficient to trigger the ACCURESP™ detection threshold the tidal  
115 volume was never deliberately increased, but where ACCURESP™ respiratory adjustment  
116 threshold was exceeded, VISITAG™ Module filter preferences during ablation employed  
117 ACCURESP™ set “off” to avoid RF annotation error.<sup>13</sup> The IPPV cohort employed fixed 6-  
118 8ml/kg ventilation at 14-16 breaths per minute, guided by end-tidal CO<sub>2</sub>; positive end-  
119 expiratory pressure 5cmH<sub>2</sub>O; 50% inspired oxygen concentration. For the HFJV cohort, GA  
120 was induced and maintained with a total intravenous anaesthesia technique guided by depth  
121 of anaesthesia monitoring (BIS™, Medtronic Inc., St Paul, MN). IPPV was employed until  
122 the mapping and ablation phases of the procedure, whereupon HFJV (Monsoon III, Acutronic  
123 Medical Systems AG, Hirzel, CH) was used via a jet ventilation catheter; inspired oxygen  
124 concentration 60% (titrated to maintain oxygen saturations  $\geq 95\%$ ); ventilation frequency 150  
125 jets/min; driving pressure 1.0 bar with 1:1 inspiration to expiration ratio.

126 A SkinTact® RO01B30 indifferent electrode (Leonhard Lang GmbH, Innsbruck, AT) was  
127 placed on the shaved skin of the thigh posterolaterally, contralateral to any orthopaedic  
128 prostheses. VISITAG™ Module and CF-guided PVI was performed during proximal pole CS  
129 pacing at 600ms using temperature-controlled RF (48°C, 17ml/min irrigation) via an EP  
130 Shuttle® (Stockert GmbH, Freiburg, DE) generator and ThermoCool® SmartTouch® catheter  
131 using Agilis™ NxT sheath (Abbott) support. VISITAG™ Module filter preferences for  
132 automated RF annotation were: Positional stability range 2mm, tag display duration 3s; force-  
133 over-time 100% minimum 1g (the latter to ensure on-going RF annotation only in the  
134 presence of constant catheter-tissue contact<sup>14</sup>). Lesion placement was guided by VISITAG™  
135 Module annotation, with the preferred site of first RF application at the LAPW opposite each

136 superior PV ~1cm from the PV ostium; in cases where constant catheter-tissue contact could  
137 only be achieved with maximal CF  $\geq 70g$ , an adjacent LAPW site with lower peak CF was  
138 chosen. The target annotated RF duration at each first-ablated LAPW site was 15s, whereas  
139 ~9-11s was the target for consecutive, adjacent sites during continuous RF delivery. Target  
140 inter-tag distance (ITD)  $\leq 6mm$  was achieved using rapid movement of the catheter tip  
141 initiated via the Agilis sheath, aided by the distance measurement tool; point-by-point (PbP)  
142 RF was also applied as necessary to achieve this end-point.

143 For the IPPV cohort, 30W RF was used at all sites. However, in view of previous  
144 investigations demonstrating ~30% greater RF effect at the left-side of the LAPW<sup>10</sup>, 20W  
145 was the peak power used during first encirclement at left-sided LAPW sites during HFJV. In  
146 addition to the RF duration targets described, annotated “per site” LAPW targets during  
147 HFJV included a minimum impedance drop of  $3\Omega$ . Following completion of circumferential  
148 PVI (entrance and exit block), spontaneous recovery of PV conduction was assessed and  
149 eliminated during a minimum 20-minute wait; dormant recovery was evaluated and  
150 eliminated a minimum of 20 minutes after the last RF. Neither oesophageal luminal  
151 temperature monitoring nor post-ablation endoscopic evaluation was employed.

152 This work received IRB approval for publication as a retrospective service evaluation. All  
153 patients provided written, informed consent.

#### 154 **Analyses**

155 Annotated first-site RF duration, mean CF and impedance drop (ImpD) data were obtained  
156 via the proprietary VISITAG™ Module export function. Bipolar electrogram (BE) peak-to-  
157 peak amplitude and the timing of unipolar electrogram (UE) morphology change from RS to  
158 pure R data were retrospectively obtained from CARTOREPLAY™ (Biosense Webster) as  
159 previously described.<sup>10</sup> Exported text files were converted to Excel data and imported to

160 GraphPad Prism version 4.03 (GraphPad Software, San Diego, CA). For correlation analyses,  
161 ImpD data was Ln transformed to achieve a normal distribution. Considering the known  
162 importance of the surface area (SA) of catheter-tissue contact towards RF lesion creation<sup>15</sup>, a  
163 hypothetical indicator of the ablation catheter-tissue SA at RF onset was retrospectively  
164 derived from VISITAG™ Module-based ablation catheter (unipolar) impedance data. This  
165 was calculated by subtracting the minimum case impedance value (from the exported  
166 “AblationData” file) from the immediate pre-RF onset impedance (i.e. “Base impedance”,  
167 BI), to derive the site-specific delta base impedance ( $\Delta$ BI).

## 168 **Statistics**

169 Comparisons were made based on the means and standard deviations [SD] of biophysical  
170 data (i.e. ILD, RF duration, CF, ImpD), or medians along with the 1<sup>st</sup> and 3<sup>rd</sup> quartile (IQR),  
171 where these data were determined to be skewed. Differences in the biophysical data between  
172 IPPV and HFJV, and left and right-sided LAPW sites were tested using the unpaired t-test, or  
173 the Mann-Whitney test where data could not be assumed to be normally distributed. The  
174 Pearson or Spearman correlation coefficient was calculated to determine the strength of  
175 association between Ln (ImpD) and both BI and  $\Delta$ BI, as appropriate. In this exploratory  
176 analysis, significance was set at the 5% level.

177

## 178 **Results**

179 The IPPV cohort comprised 25 patients (November 2016 – May 2017): 13 persistent AF, 12  
180 PAF; 19 male (76%); mean age 57 [14] years and CHA<sub>2</sub>DS<sub>2</sub>-VASc score 1.3 [1.3]. The  
181 HFJV cohort comprised 15 patients (July 2018 – June 2019): 9 persistent AF, 6 PAF; 12 male  
182 (80%); mean age 60 [9] years and CHA<sub>2</sub>DS<sub>2</sub>-VASc score 1.2 [1.1]. Complete PVI with the  
183 elimination of spontaneous and/or dormant recovery of PV conduction was achieved



184 following 16.2 [3.1] and 20.0 [4.6] minutes of RF for IPPV and HFJV cohorts, respectively.  
185 For the IPPV cohort, pulmonary vein (PV) carina RF was applied in 18/25 patients (72%);  
186 i.e. left PV carina in 8/25 (32%) and right PV carina in 16/25 (64%). For the HFJV cohort,  
187 PV carina RF was applied in 13/15 patients (87%); i.e. left PV carina in 10/15 (67%), right  
188 PV carina only 10/15 (67%). There were no procedural complications.

189 In the IPPV cohort, 3 first-ablated sites were excluded from analysis; inadvertent catheter  
190 displacement at two left-sided sites resulted in RF annotation termination at 4.4s and 7.9s,  
191 while catheter displacement at RF onset resulted in 5.0s non-annotated RF delivery for one  
192 right-sided site. In the HFJV cohort, 4 first-ablated sites were excluded from analysis: For  
193 one left-sided site, DC cardioversion (DCCV)-refractory AF was present, while inadvertent  
194 catheter displacement resulted in RF annotation termination at 7.1s in another; pure R UE  
195 morphology change was not achieved at one left-sided site with pre-ablation bipolar  
196 electrogram (BE) amplitude 0.7mV, annotated RF duration 14.7s, mean CF 21g, and ImpD  
197  $8.6\Omega$  - excepting the one case of DCCV-refractory AF, this was the lowest pre-ablation BE  
198 amplitude in the HFJV cohort and was considered an outlier; inadvertent catheter  
199 displacement resulted in RF annotation termination at 7.6s for one right-sided site.

## 200 **Biophysical data: IPPV cohort**

201 First-ablated LAPW site biophysical data according to ventilatory protocol and PV pair  
202 proximity at the LAPW are shown in table 1. During IPPV and using 30W, annotated RF  
203 duration was in keeping with the protocol; i.e. median 14.9s versus 15.0s, left PV (LPV)  
204 versus right PV (RPV) aspects of the LAPW respectively. There was no significant difference  
205 in pre-ablation BE amplitude; median 1.5mV versus 1.7mV ( $p=0.95$ ), LPV and RPV  
206 respectively. Mean CF was significantly greater at RPV LAPW sites; i.e. 16.5g versus 11.2g  
207 ( $p=0.003$ ), RPV and LPV respectively. During IPPV, both ImpD and time to pure R UE

208 morphology change data indicated significantly greater RF effects at the left side of the  
209 LAPW: median ImpD  $13.6\Omega$  versus  $9.9\Omega$  ( $p<0.0001$ ), LPV versus RPV respectively; mean  
210 time to pure R UE morphology change  $4.9s$  versus  $6.7s$  ( $p=0.007$ ), LPV versus RPV  
211 respectively.

212 During IPPV the mean BI was significantly greater at left-sided LAPW sites; i.e. median  
213  $182\Omega$  versus  $175\Omega$  ( $p=0.002$ ), LPV versus RPV. The mean minimum (total case) impedance  
214 was  $141\Omega$ , therefore the mean  $\Delta BI$  was significantly greater at LPV versus RPV sites; i.e.  
215  $45.0\Omega$  versus  $35.3\Omega$  ( $p=0.01$ ), LPV versus RPV respectively. For left-sided LAPW sites, both  
216 BI and  $\Delta BI$  demonstrated significant positive correlation with  $\ln(\text{ImpD})$ , but correlation was  
217 strongest for  $\Delta BI$ : i.e. BI with  $\ln(\text{ImpD})$  Pearson  $r=0.66$  ( $0.34 - 0.84$ ,  $p=0.0006$ );  $\Delta BI$  with  
218  $\ln(\text{ImpD})$   $r=0.84$  ( $0.65 - 0.93$ ,  $p<0.0001$ ). For right-sided LAPW sites, neither BI nor  $\Delta BI$   
219 demonstrated significant correlation with  $\ln(\text{ImpD})$ ; i.e. Spearman  $r=0.33$  ( $-0.10 - 0.65$ ,  
220  $p=0.12$ ) and  $r=0.26$  ( $-0.18 - 0.61$ ,  $p=0.23$ ) for BI with  $\ln(\text{ImpD})$ , and  $\Delta BI$  with  $\ln(\text{ImpD})$   
221 respectively (figure 1).

## 222 **Biophysical data: HFJV cohort**

223 During HFJV, and using 20W and 30W at left and right-sided LAPW sites respectively,  
224 annotated RF duration was in keeping with the protocol; i.e. median  $14.5s$ , both PVs. There  
225 was no significant difference in pre-ablation BE amplitude; median  $1.5mV$  versus  $1.7mV$   
226 ( $p=0.94$ ), LPV and RPV respectively. There was no difference in mean CF during HFJV; i.e.  
227  $12.5g$  and  $12.0g$  ( $p=0.61$ ), LPV versus RPV respectively. During HFJV, median ImpD was  
228 greater at LPV sites ( $9.7\Omega$  versus  $7.4\Omega$ ,  $p=0.21$ ) but this did not reach statistical significance.  
229 However, time to pure R UE morphology change was significantly shorter at LPV sites; i.e.  
230 mean  $4.3s$  versus  $6.1s$  ( $p=0.02$ ), LPV versus RPV respectively.

231 During HFJV the mean BI was significantly greater at left-sided LAPW sites; i.e. 183Ω  
232 versus 174Ω (p=0.03), LPV versus RPV respectively. The mean minimum (total case)  
233 impedance was 143Ω and 136Ω, LPV and RPV respectively (p=0.25). Therefore, the mean  
234 ΔBI was significantly greater at LPV versus RPV sites; i.e. 45.7Ω versus 32.4Ω (p=0.004),  
235 LPV versus RPV respectively. At left-sided LAPW sites during HFJV both BI and ΔBI  
236 demonstrated significant positive correlation with Ln(ImpD), but correlation was strongest  
237 for ΔBI; BI with Ln(ImpD), Pearson r=0.59 (0.03 – 0.87, p=0.04), whereas ΔBI with Ln  
238 (ImpD), r=0.77 (0.35 – 0.93, p=0.004). At right-sided LAPW sites during HFJV there was no  
239 significant correlation between BI and Ln(ImpD); Spearman r=0.33 (-0.26 – 0.74, p=0.25).  
240 However, right-sided LAPW sites during HFJV demonstrated moderate positive correlation  
241 for ΔBI with Ln(ImpD); Spearman r=0.54 (-0.007 – 0.84, p=0.047, figure 2).

242 There was no significant correlation between mean CF and Ln(ImpD) within any ventilatory  
243 group; i.e. r=-0.24, 0.07, 0.02 and -0.10 for LPV IPPV, RPV IPPV, LPV HFJV and RPV  
244 HFJV, respectively.

245

## 246 **Discussion**

247 The main finding of this present report is that heterogeneity of RF effect at the LAPW was  
248 not eliminated using a HFJV protocol; i.e. greater effect remained evident at left-sided sites,  
249 despite reducing left-sided LAPW power delivery by 30%. Therefore, although heterogeneity  
250 of RF effect cannot be completely explained on the basis of respiratory motion-induced  
251 differences catheter-tissue interaction, these present data can be used to derive hypotheses  
252 towards other possible mechanisms underlying heterogeneity of RF effects during PVI.

253

254 **Hypothetical mechanisms underlying heterogeneity of RF effects *in vivo***

255 In this present experimental set-up, identical and objectively annotated parameters for  
256 position and CF stability – the two presently measurable components of catheter “stability”  
257 – were prospectively employed in order to meet a suitable definition of a “stable” point: (1)  
258 Position stability range 2mm with ACCURESP “off” – VISITAG™ Module logic previously  
259 shown to satisfy “stable point” criteria<sup>13</sup>, and; (2) force-over-time 100%, minimum 1g CF –  
260 self-evidently, constant catheter-tissue contact is a prerequisite at “stable” sites.<sup>14</sup> Previous  
261 investigations have demonstrated that greater RF effect at left-sided LAPW sites was not  
262 simply due to measurably superior position stability.<sup>10</sup> Therefore, assuming equal RF  
263 generator power delivery, greater RF effect in this *in vivo* model must result from either  
264 greater catheter-tissue interaction stability as a result of significantly lower *out-of-phase* (i.e.  
265 sliding) catheter-tissue interaction, and/or a greater SA of catheter-tissue contact.

266 From a theoretical standpoint, if an ablation catheter is kept “positionally stable” and  
267 (knowingly) remains stable throughout “per-site” RF delivery without significant out-of-  
268 phase catheter-tissue interaction, differences in the SA of catheter-tissue contact will be the  
269 principal determinant of measurable differences of RF effects, since:

270 
$$\text{“Tissue power” (P)} = I^2 \cdot R$$

271 (I is current density and R, tissue resistance).<sup>15</sup>

272 In this theoretical model of stable catheter-tissue interaction, any suitable measure of the SA  
273 of catheter-tissue contact will demonstrate strong positive correlation with RF effects.

274 Therefore, this present report’s finding of a strong positive correlation between  $\Delta BI$  and  
275  $\ln(\text{ImpD})$  at left-sided LAPW sites indicates not only that  $\Delta BI$  may represent a suitable  
276 indicator of the SA of catheter-tissue contact *in vivo*, but also that catheter-tissue interaction  
277 at left-sided LAPW sites is predominantly *in-phase*. At the right-sided LAPW sites, the

278 significantly lower  $\Delta BI$  supports the proposition that  $\Delta BI$  provides a suitable measure of  
279 catheter-tissue contact SA. However, during IPPV and despite ablation catheter motion  
280 remaining within identical pre-defined limits, the lack of significant correlation between  $\Delta BI$   
281 and  $\text{Ln}(\text{ImpD})$  indicates significant and presently un-measurable, *out-of-phase* catheter-  
282 tissue interaction. In contrast, the finding of a modest positive correlation between  $\Delta BI$  and  
283  $\text{Ln}(\text{ImpD})$  at right-sided LAPW sites during HFJV indicates that the operative environment  
284 during HFJV is characterised by a reduction in out-of-phase catheter-tissue interaction, but  
285 not to the same level of in-phase stability as that inferred using these methods at left-sided  
286 LAPW sites.

287 Possible mechanisms for significant differences in the SA of catheter-tissue contact  
288 comparing left and right-sided sites could include either/or both of: (1) Differences in the  
289 angle of the catheter tip with respect to the target tissue, such that at some sites the contact  
290 surface may include both the (tip) face and lateral aspects of the catheter tip, whereas at  
291 others, contact is limited to the surface of the (tip) face only; (2) Differences in tissue  
292 compliance, with greater SA resulting from more compliant tissue enveloping the catheter tip,  
293 potentially even at lower CF. These present data do not permit further conclusions to be  
294 drawn regarding the relative importance of these possible mechanisms *in vivo*, however,  
295 greater impedance drop has been demonstrated during PVI with parallel or oblique catheter-  
296 tissue angle ( $30^\circ - 145^\circ$ ) compared to perpendicular ( $0 - 30^\circ$ ).<sup>8</sup>

### 297 **Pre-ablation impedance as a possible determinant of RF effect *in vivo***

298 Previous investigations during slow pathway and accessory pathway RF ablation  
299 demonstrated strong positive correlation between the initial generator impedance (GI) and  
300 electrode temperature during RF delivery.<sup>16</sup> In a pig thigh model of RF ablation using a linear  
301 multi-electrode catheter, greater baseline (unipolar) impedance was demonstrated with

302 greater applied downward force, and there was a strong positive correlation between baseline  
303 impedance and lesion depth and width.<sup>17</sup> More recently and using an ablation catheter with  
304 mini-electrodes incorporated in the distal electrode (Rhythmia™ and IntellaNav MiFi™ OI,  
305 Boston Scientific, Marlborough, MA), the predictive utility of baseline generator and local  
306 impedances (LI – taken as the maximal value from all three mini electrodes) were  
307 investigated during PVI. The baseline GI demonstrated weak positive correlation with  
308 subsequent RF-induced GI drop (adjusted  $R^2=0.06$ ,  $p<0.001$ ). However, higher baseline LI  
309 predicted higher LI drop during ablation (adjusted  $R^2=0.41$ ,  $p<0.001$ ).<sup>18</sup> Lastly, finite element  
310 modelling of a 7F 4mm ablation catheter and homogeneous tissue slab (4mm thickness) with  
311 simulations of varying depth and angle of catheter-tissue interaction, demonstrated a very  
312 strong positive correlation between increasing contact area and impedance ( $R=0.97$ ).  
313 Moreover, while the impedance increased at greater depth of catheter-tissue penetration, the  
314 catheter angle was a significant determinant of impedance; incrementally greater impedance  
315 was noted as the angle was decreased from  $90^\circ$  to  $15^\circ$  in  $15^\circ$  steps. Importantly, catheter angle  
316 was a more important determinant of impedance at greater modelled depth of tissue  
317 penetration.<sup>19</sup>

### 318 **Clinical implications**

319 The inference of both significantly greater *in-phase* catheter-tissue interaction and greater SA  
320 of stable contact at left-sided LAPW sites provides the perfect milieu for inadvertent extra-  
321 cardiac thermal trauma from a “one-size-fits-all”, single RF power and duration delivery  
322 protocol during PVI. Similarly, ablation protocols employing identical LAPW RF targets  
323 using theoretical composite measures of RF delivery (i.e. Ablation Index – AI, or VISITAG  
324 SURPOINT™, Biosense Webster – and lesion size index – LSI, Abbott) will also result in  
325 heterogeneous tissue injury during PVI, perpetuating this risk.<sup>4,6</sup> This is particularly  
326 concerning in view of the more frequently occurring left-sided oesophageal position<sup>20</sup> and

327 high case fatality rates of ablation-induced atrio-oesophageal fistula.<sup>21</sup> Therefore for greater  
328 safety, operators may wish to consider adopting protocols involving lower RF power, shorter  
329 RF duration and/or lower AI/LSI targets at the left side of the LAPW, or simply utilising  
330 more direct and *in vivo* validated measures of tissue RF effect including impedance drop  
331 and/or pure R UE morphology change.<sup>10,22–24</sup>

332 Since  $\Delta$ BI may represent a useful site-specific *pre-ablation predictor* of RF effect, operators  
333 may wish to mimic this described operative “stability set-up”. Specifically, with  $\Delta$ BI  
334 representing a putative predictor of RF effect within this reproducible “operative stability  
335 environment”, the risk of extra-cardiac thermal trauma during RF delivery using higher  
336 power (50-90W) over very short ablation intervals (e.g. 3-5s)<sup>25,26</sup> – i.e. within potentially very  
337 narrow therapeutic windows and involving significant latency<sup>27</sup> – may be reduced by  
338 modified protocols incorporating  $\Delta$ BI data. In contrast, protocols using deep conscious  
339 sedation with consequent greater random variability of respiratory profile and occasional  
340 inadvertent patient movement are unlikely to demonstrate similar predictive utility of  $\Delta$ BI  
341 towards subsequent “per-site” RF effects.

#### 342 **Limitations**

343 Time to pure R UE morphology change is an imperfect indicator of RF effect in the absence  
344 of left atrial wall thickness data; i.e. shorter time to pure R alone does not necessarily indicate  
345 greater RF effect. The methodology for defining the site-specific ablation catheter-to-tissue  
346 contact SA described in this present report (i.e.  $\Delta$ BI) is theoretical. Indeed, more appropriate  
347 methodology towards deriving putative “predictive”  $\Delta$ BI values would be to subtract the pre-  
348 ablation “blood-pool” impedance from site-specific BI. However, at the outset of these  
349 present investigations “blood-pool” impedance data were not known to be of potential use,  
350 and there were no means to obtain these data retrospectively. Clearly, the hypothesis that pre-

351 ablation  $\Delta$ BI represents a site-specific predictor of RF effect during PVI requires further  
352 investigations using “blood-pool” impedance values.

353 These data are limited by their single operator status, applicability to the operative stability  
354 conditions described and choice of RF annotation logic using the VISITAG™ Module.

355 However, such stringent catheter stability criteria alongside measureable (and visible to any  
356 operator) VISITAG™ Module data outputs may permit these present investigations to form  
357 the basis of knowingly reproducible RF delivery *in vivo*, both on an intra and inter-operator  
358 basis. These data should not be considered applicable to TactiCath™-based ablation (Abbott),  
359 since according to the dimensions of the ablation catheter tip electrode, angle-dependent  
360 changes in the SA of contact will result in catheter-specific differences in tissue RF current  
361 density and ablation effect.<sup>28</sup>

362 RF power output from the EP Shuttle® RF generator has been shown to vary according to the  
363 pre-ablation impedance; i.e. comparing 30W at 150Ω versus 200Ω, power output at 200Ω  
364 was 14% greater, measuring 34.1W.<sup>29</sup> However, differences between left and right-sided  
365 LAPW BI values in this present report (IQR 177 – 196 and 170 – 180 for LPV and RPV,  
366 respectively) were probably insufficient to importantly influence generator RF power output  
367 and furthermore, greater RF effect remained at left-sided sites during HFJV despite 30%  
368 lower power delivery at left-sided sites.

369

## 370 **Conclusions**

371 These data support the hypothesis that greater RF ablation effect at left-sided LAPW sites  
372 results from significantly greater SA of catheter-to-tissue contact and in-phase catheter-tissue  
373 motion. However, HFJV may usefully reduce out-of-phase catheter-tissue motion at right-



374 sided LAPW sites. Using suitably stable and reproducible conditions of catheter-tissue  
375 contact,  $\Delta$ BI may represent a useful site-specific predictor of RF ablation effect, towards  
376 improving the safety and efficacy of PVI.

377

## 378 **Acknowledgements**

379 I am grateful to Cherith Wood, Daniel Newcomb and Ian Lines, Cardiac Physiologists, for  
380 their technical support into all cases conducted during this report and Dr David Adams and  
381 Dr Kate Holmes for establishing and delivering the HFJV protocol. I am also grateful to  
382 Robert Pearce and Vicky Healey (Biosense Webster Inc.) for additional technical assistance  
383 and to Noam Seker-Gafni, Tal Bar-on, Einav Geffen, Assaf Rubissa and colleagues at the  
384 Haifa Technology Center, Israel for their help with VISITAG™ Module technical queries. I  
385 am grateful to Katie Biscombe, John True, Joanne Hosking and Adam Streeter (Department  
386 of Medical Statistics, Plymouth University Peninsula Schools of Medicine and Dentistry) for  
387 their previous R code development and analyses permitting reference to previously identified  
388 measures of catheter stability in this present report.

389

## 390 **Sources of Funding**

391 Nil

392

## 393 **Disclosures**

394 None

395

396 **Table legends**

397 Table 1: Biophysical data according to ventilatory protocol and pulmonary vein (PV) pair  
398 proximity (i.e. left and right PV, LPV and RPV, respectively) at first-ablated LAPW sites.  
399 Data shown are mean [SD] and median (1<sup>st</sup> – 3<sup>rd</sup> quartile), as appropriate (BE,  
400 CARTOREPLAY™-derived peak-to-peak bipolar electrogram amplitude; BI, baseline  
401 impedance;  $\Delta$ BI, minimum case impedance subtracted from BI; Ln(ImpD), natural log of the  
402 annotated impedance drop).

403

404

405

406

407

408

409

410

411

412

413

414

415

|                                              | IPPV (N=25)           |                        |         | HFJV (N=15)           |                         |       |
|----------------------------------------------|-----------------------|------------------------|---------|-----------------------|-------------------------|-------|
|                                              | LPV (30W; N=23)       | RPV (30W; N=24)        | p       | LPV (20W; N=12)       | RPV (30W; N=14)         | p     |
| RF duration (s)                              | 14.9<br>(14.3 – 15.7) | 15.0<br>(14.6 – 15.4)  | 0.70    | 14.5<br>(14.1 – 15.1) | 14.5<br>(13.7 – 15.0)   | 0.40  |
| Pre-RF BE (mV)                               | 1.5<br>(1.1 – 3.1)    | 1.7<br>(1.0 – 2.3)     | 0.95    | 1.5<br>(1.1 – 2.9)    | 1.7<br>(1.0 – 3.1)      | 0.94  |
| Mean CF (g)                                  | 11.2<br>(9.0 – 13.4)  | 16.5<br>(12.2 – 18.4)  | 0.003   | 12.5<br>(10.0 – 14.9) | 12.0<br>(9.4 – 12.2)    | 0.61  |
| Impedance drop ( $\Omega$ )                  | 13.6<br>(12.2 – 24.4) | 9.9<br>(7.9 – 11.6)    | <0.0001 | 9.7<br>(7.2 – 13.7)   | 7.4<br>(6.7 – 9.6)      | 0.21  |
| Time to pure R UE (s)                        | 4.9<br>[2.1]          | 6.7<br>[2.5]           | 0.007   | 4.3<br>[1.4]          | 6.1<br>[2.1]            | 0.02  |
| BI ( $\Omega$ )                              | 182<br>(177 – 196)    | 175<br>(170 – 180)     | 0.002   | 183<br>(175 – 201)    | 174<br>(160 – 182)      | 0.03  |
| $\Delta$ BI ( $\Omega$ )                     | 45.0<br>[15.2]        | 35.3<br>[9.0]          | 0.01    | 45.7<br>[9.4]         | 32.4<br>[9.0]           | 0.004 |
| Pearson/Spearman r: BI vs Ln (ImpD)          | 0.66<br>(0.34 – 0.84) | 0.33<br>(-0.10 – 0.65) | NA      | 0.59<br>(0.03 – 0.87) | 0.33<br>(-0.26 – 0.74)  | NA    |
| Pearson/Spearman r: $\Delta$ BI vs Ln (ImpD) | 0.84<br>(0.65 – 0.93) | 0.26<br>(-0.18 – 0.61) | NA      | 0.77<br>(0.35 – 0.93) | 0.54<br>(-0.007 – 0.84) | NA    |

Table 1

416 **Figure legends**

417 Figure 1: Correlation between  $\Delta$ BI and Ln(ImpD) during IPPV according to PV proximity

418 (Pearson / Spearman correlation is displayed, as appropriate).

419

420 Figure 2: Correlation between  $\Delta$ BI and Ln(ImpD) during HFJV according to PV proximity

421 (Pearson / Spearman correlation is displayed, as appropriate).

422

423

424

425

426

427

428

429

430

431

432

433

434

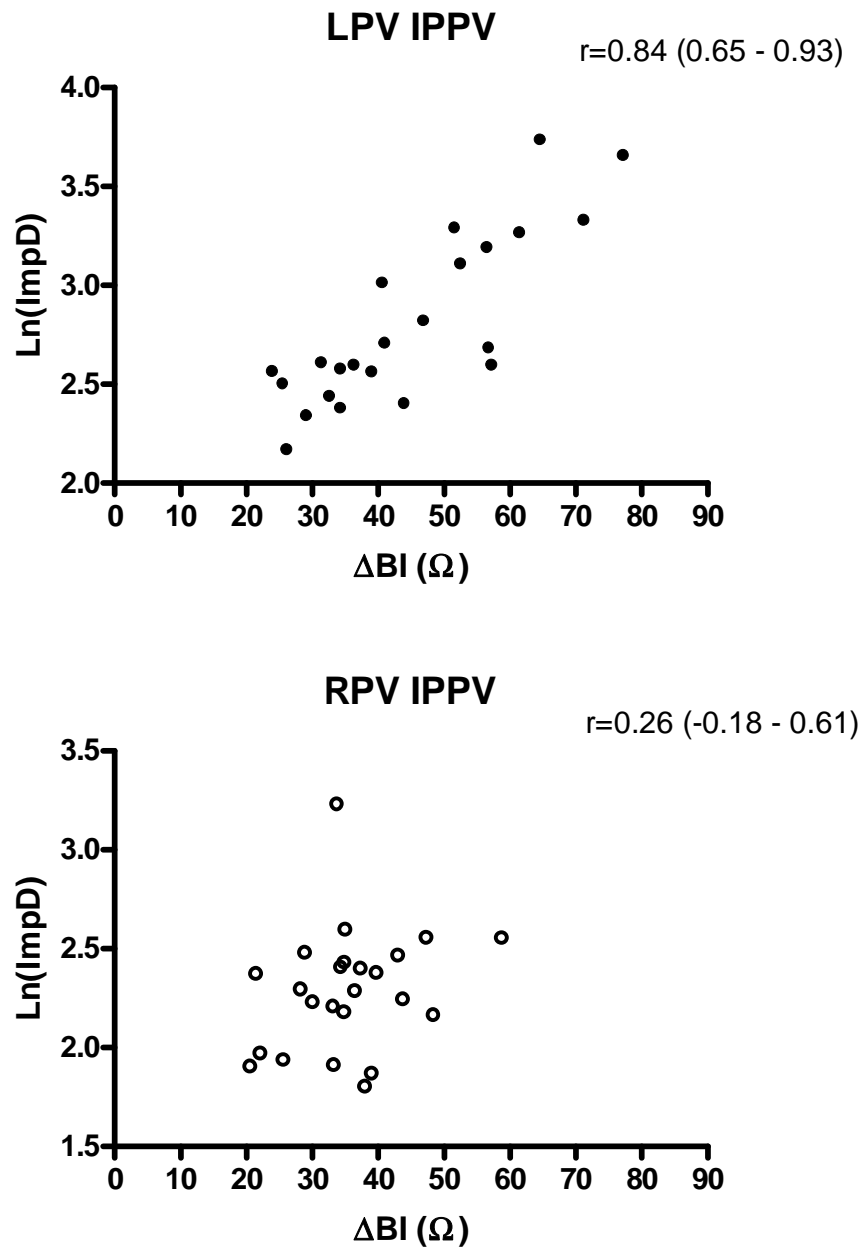

435

436 Figure 1

437

438

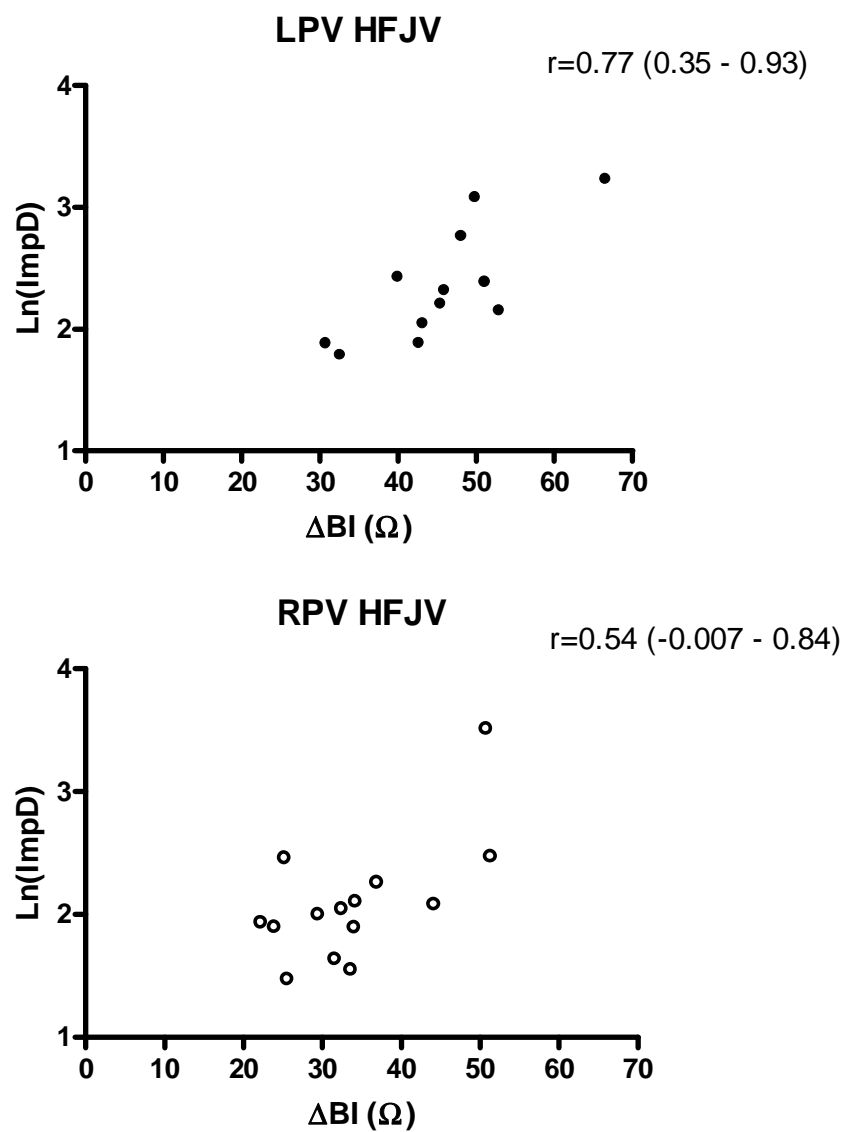

439

440 Figure 2

441

442

443

444

## 445 **References**

- 446 1. Calkins H, Hindricks G, Cappato R, Kim Y-H, Saad EB, Aguinaga L, et al. 2017  
447 HRS/EHRA/ECAS/APHRs/SOLAECE expert consensus statement on catheter and  
448 surgical ablation of atrial fibrillation. Heart Rhythm [Internet]. 2017 Oct [cited 2019  
449 Jan 23];14(10):e275–444. Available from:  
450 <http://www.ncbi.nlm.nih.gov/pubmed/28506916>
- 451 2. Kowalski M, Grimes MM, Perez FJ, Kenigsberg DN, Koneru J, Kasirajan V, et al.  
452 Histopathologic characterization of chronic radiofrequency ablation lesions for  
453 pulmonary vein isolation. J Am Coll Cardiol [Internet]. 2012 Mar 6 [cited 2019 Oct  
454 4];59(10):930–8. Available from:  
455 <https://linkinghub.elsevier.com/retrieve/pii/S0735109711052697>
- 456 3. Medeiros De Vasconcelos JT, Filho S dos SG, Atié J, Maciel W, De Souza OF, Saad  
457 EB, et al. Atrial-oesophageal fistula following percutaneous radiofrequency catheter  
458 ablation of atrial fibrillation: the risk still persists. Europace [Internet]. 2016 Oct 6  
459 [cited 2017 Nov 20];19(2):euw284. Available from:  
460 <http://www.ncbi.nlm.nih.gov/pubmed/28175286>
- 461 4. Das M, Loveday JJ, Wynn GJ, Gomes S, Saeed Y, Bonnett LJ, et al. Ablation index, a  
462 novel marker of ablation lesion quality: prediction of pulmonary vein reconnection at  
463 repeat electrophysiology study and regional differences in target values. Europace  
464 [Internet]. 2016 May 31 [cited 2017 Nov 20];19(5):euw105. Available from:  
465 <http://www.ncbi.nlm.nih.gov/pubmed/27247002>
- 466 5. Hussein A, Das M, Riva S, Morgan M, Ronayne C, Sahni A, et al. Use of Ablation  
467 Index-Guided Ablation Results in High Rates of Durable Pulmonary Vein Isolation

- 468 and Freedom From Arrhythmia in Persistent Atrial Fibrillation Patients. *Circ*  
469 *Arrhythmia Electrophysiol* [Internet]. 2018 Sep [cited 2019 Jan 23];11(9):e006576.  
470 Available from: <http://www.ncbi.nlm.nih.gov/pubmed/30354288>
- 471 6. Taghji P, El Haddad M, Philips T, Wolf M, Knecht S, Vandekerckhove Y, et al.  
472 Evaluation of a Strategy Aiming to Enclose the Pulmonary Veins With Contiguous and  
473 Optimized Radiofrequency Lesions in Paroxysmal Atrial Fibrillation: A Pilot Study.  
474 *JACC Clin Electrophysiol*. 2018;4(1):99–108.
- 475 7. Wolf M, El Haddad M, De Wilde V, Philips T, De Pooter J, Almorad A, et al.  
476 Endoscopic evaluation of the esophagus after catheter ablation of atrial fibrillation  
477 using contiguous and optimized radiofrequency applications. *Hear Rhythm* [Internet].  
478 2019 Jul [cited 2019 Oct 4];16(7):1013–20. Available from:  
479 <http://www.ncbi.nlm.nih.gov/pubmed/30710736>
- 480 8. Knecht S, Reichlin T, Pavlovic N, Schaer B, Osswald S, Sticherling C, et al. Contact  
481 force and impedance decrease during ablation depends on catheter location and  
482 orientation: insights from pulmonary vein isolation using a contact force-sensing  
483 catheter. *J Interv Card Electrophysiol* [Internet]. 2015 Sep 30 [cited 2019 Jan  
484 23];43(3):297–306. Available from: <http://www.ncbi.nlm.nih.gov/pubmed/25925494>
- 485 9. Chelu MG, Morris AK, Kholmovski EG, King JB, Kaur G, Silver MA, et al. Durable  
486 lesion formation while avoiding esophageal injury during ablation of atrial fibrillation:  
487 Lessons learned from late gadolinium MR imaging. *J Cardiovasc Electrophysiol*  
488 [Internet]. 2018 Mar [cited 2019 Jan 23];29(3):385–92. Available from:  
489 <http://www.ncbi.nlm.nih.gov/pubmed/29345381>
- 490 10. Tomlinson DR, Myles M, Stevens KN, Streeter AJ. Transmural unipolar electrogram



- 491 change occurs within 7s at the left atrial posterior wall during pulmonary vein  
492 isolation. *Pacing Clin Electrophysiol* [Internet]. 2019 May 24 [cited 2019 Jun  
493 12];pace.13729. Available from:  
494 <https://onlinelibrary.wiley.com/doi/abs/10.1111/pace.13729>
- 495 11. Otomo K, Uno K, Fujiwara H, Isobe M IY. Local unipolar and bipolar electrogram  
496 criteria for evaluating the transmural of atrial ablation lesions at different catheter  
497 orientations relative to the endocardial surface. *Heart Rhythm*. 2010;7(9):1291–300.
- 498 12. Bortone A, Brault-Noble G, Appetiti A, Marijon E. Elimination of the negative  
499 component of the unipolar atrial electrogram as an in vivo marker of transmural lesion  
500 creation: acute study in canines. *Circ Arrhythm Electrophysiol* [Internet]. 2015 Aug  
501 [cited 2015 Nov 23];8(4):905–11. Available from:  
502 <http://www.ncbi.nlm.nih.gov/pubmed/26092576>
- 503 13. Tomlinson DR, Biscombe K, True J, Hosking J, Streeter AJ. Ablation catheter motion  
504 detection during contact force and VISITAG<sup>TM</sup> Module-guided pulmonary vein  
505 isolation. *bioRxiv* [Internet]. 2019 Jan 1;631374. Available from:  
506 <http://biorxiv.org/content/early/2019/05/08/631374.abstract>
- 507 14. Tomlinson DR. Derivation and validation of a VISITAG<sup>TM</sup>-guided contact force  
508 ablation protocol for pulmonary vein isolation. *bioRxiv* [Internet]. 2017 Dec 13 [cited  
509 2017 Dec 14];232694. Available from:  
510 <https://www.biorxiv.org/content/early/2017/12/13/232694>
- 511 15. Wittkamp FHM, Nakagawa H. RF Catheter Ablation: Lessons on Lesions. *Pacing*  
512 *Clin Electrophysiol* [Internet]. 2006 Nov [cited 2017 Nov 20];29(11):1285–97.  
513 Available from: <http://www.ncbi.nlm.nih.gov/pubmed/17100685>

- 514 16. Nsah E, Berger R, Rosenthal L, Hui R, Ramza B, Jumrussirikul P, et al. Relation  
515 between impedance and electrode temperature during radiofrequency catheter ablation  
516 of accessory pathways and atrioventricular nodal reentrant tachycardia. *Am Heart J*  
517 [Internet]. 1998 Nov [cited 2019 Oct 4];136(5):844–51. Available from:  
518 <http://www.ncbi.nlm.nih.gov/pubmed/9812080>
- 519 17. Zheng X, Walcott GP, Hall JA, Rollins DL, Smith WM, Kay GN, et al. Electrode  
520 impedance: an indicator of electrode-tissue contact and lesion dimensions during linear  
521 ablation. *J Interv Card Electrophysiol* [Internet]. 2000 Dec [cited 2015 Nov  
522 11];4(4):645–54. Available from: <http://www.ncbi.nlm.nih.gov/pubmed/11141212>
- 523 18. Gunawardene M, Münkler P, Eickholt C, Akbulak RÖ, Jularic M, Klatt N, et al. A  
524 novel assessment of local impedance during catheter ablation: initial experience in  
525 humans comparing local and generator measurements. *EP Eur* [Internet]. 2019 Jan 1  
526 [cited 2019 Oct 4];21(Supplement\_1):i34–42. Available from:  
527 <http://www.ncbi.nlm.nih.gov/pubmed/30801126>
- 528 19. Gallagher NP, Fear EC, Vigmond EJ, Byrd IA. Catheter contact geometry affects  
529 lesion formation in radio-frequency cardiac catheter ablation. *Conf Proc . Annu Int*  
530 *Conf IEEE Eng Med Biol Soc IEEE Eng Med Biol Soc Annu Conf* [Internet]. 2011  
531 Aug [cited 2019 Oct 4];2011:243–6. Available from:  
532 <http://ieeexplore.ieee.org/document/6090046/>
- 533 20. Rolf S, Boldt L-H, Parwani AS, Wutzler A, Huemer M, Blaschke D, et al. Findings  
534 and outcome of fluoroscopic visualization of the oesophageal course during catheter  
535 ablation of atrial fibrillation. *Europace* [Internet]. 2011 Jun 1 [cited 2019 Oct  
536 4];13(6):796–802. Available from: <http://www.ncbi.nlm.nih.gov/pubmed/21398313>

- 537 21. Mohanty S, Santangeli P, Mohanty P, Biase L Di, Trivedi C, Bai R, et al. Outcomes of  
538 atrioesophageal fistula following catheter ablation of atrial fibrillation treated with  
539 surgical repair versus esophageal stenting. *J Cardiovasc Electrophysiol* [Internet]. 2014  
540 Jun [cited 2017 Nov 20];25(6):579–84. Available from:  
541 <http://www.ncbi.nlm.nih.gov/pubmed/25013875>
- 542 22. Avitall B, Mughal K, Hare J, Helms R, Krum D. The effects of electrode-tissue contact  
543 on radiofrequency lesion generation. *Pacing Clin Electrophysiol* [Internet]. 1997 Dec  
544 [cited 2019 Oct 4];20(12 Pt 1):2899–910. Available from:  
545 <http://doi.wiley.com/10.1111/j.1540-8159.1997.tb05458.x>
- 546 23. Bortone A, Appetiti A, Bouzeman A, Maupas E, Ciobotaru V, Boulenc J-M, et al.  
547 Unipolar signal modification as a guide for lesion creation during radiofrequency  
548 application in the left atrium: prospective study in humans in the setting of paroxysmal  
549 atrial fibrillation catheter ablation. *Circ Arrhythm Electrophysiol* [Internet]. 2013 Dec  
550 [cited 2015 Nov 11];6(6):1095–102. Available from:  
551 <http://www.ncbi.nlm.nih.gov/pubmed/24097371>
- 552 24. Pambrun T, Durand C, Constantin M, Masse A, Marra C, Meillet V, et al. High-Power  
553 (40–50 W) Radiofrequency Ablation Guided by Unipolar Signal Modification for  
554 Pulmonary Vein Isolation. *Circ Arrhythmia Electrophysiol* [Internet]. 2019 Jun [cited  
555 2019 Oct 4];12(6):e007304. Available from:  
556 <http://www.ncbi.nlm.nih.gov/pubmed/31164003>
- 557 25. Baher A, Kheirkhahan M, Rechenmacher SJ, Marashly Q, Kholmovski EG,  
558 Siebermair J, et al. High-Power Radiofrequency Catheter Ablation of Atrial  
559 Fibrillation. *JACC Clin Electrophysiol* [Internet]. 2018 Dec [cited 2019 Jan  
560 23];4(12):1583–94. Available from: <http://www.ncbi.nlm.nih.gov/pubmed/30573123>

- 561 26. Reddy VY, Grimaldi M, De Potter T, Vijgen JM, Bulava A, Duytschaever MF, et al.  
562 Pulmonary Vein Isolation With Very High Power, Short Duration, Temperature-  
563 Controlled Lesions. *JACC Clin Electrophysiol* [Internet]. 2019 Jul [cited 2019 Oct  
564 4];5(7):778–86. Available from: <http://www.ncbi.nlm.nih.gov/pubmed/31320006>
- 565 27. Irastorza RM, d'Avila A, Berjano E. Thermal latency adds to lesion depth after  
566 application of high-power short-duration radiofrequency energy: Results of a  
567 computer-modeling study. *J Cardiovasc Electrophysiol* [Internet]. 2018 Feb [cited  
568 2019 Jan 23];29(2):322–7. Available from:  
569 <http://www.ncbi.nlm.nih.gov/pubmed/28988468>
- 570 28. Nakagawa H, Wittkamp FH, Yamanashi WS, Pitha J V, Imai S, Campbell B, et al.  
571 Inverse relationship between electrode size and lesion size during radiofrequency  
572 ablation with active electrode cooling. *Circulation* [Internet]. 1998 Aug 4 [cited 2019  
573 Oct 4];98(5):458–65. Available from: <http://www.ncbi.nlm.nih.gov/pubmed/9714097>
- 574 29. Bourier F, Schwarz B, Brkic A, Wolff L, Semmler V, Kottmaier M, et al. EP  
575 radiofrequency generators: Significant offsets between selected and delivered power? *J*  
576 *Cardiovasc Electrophysiol* [Internet]. 2018 Feb [cited 2019 Oct 4];29(2):330–4.  
577 Available from: <http://www.ncbi.nlm.nih.gov/pubmed/29149500>
- 578
- 579
- 580
- 581
- 582
